# Supplementary material for: Continuum beliefs in the stigma process regarding persons with schizophrenia and depression: results of path analyses
Source: PeerJ. 2016 Sep 27;4:e2360. doi: 10.7717/peerj.2360 (PMC5045891; doi:10.7717/peerj.2360)
Supplement: Supplemental Information 4 [file peerj-04-2360-s004.docx]

**Table A1** Correlations between continuum belief, stereotypes, emotional reactions and desire for social distance (Schizophrenia)

|  | Continuum Belief | Unpredictable | Dangerous | Anger | Fear | Prosocial |
| --- | --- | --- | --- | --- | --- | --- |
| Unpredictable | -0.015 |  |  |  |  |  |
| Dangerous | -0.004 | 0.464** |  |  |  |  |
| Anger | 0.030 | 0.206** | 0.206** |  |  |  |
| Fear | -0.060* | 0.301* | 0.306** | 0.387** |  |  |
| Prosocial | 0.073** | -0.004 | -0.063* | -0.077** | -0.043 |  |
| Desire for social distance | -0.090** | 0.378** | 0.378** | 0.205** | 0.285** | -0.242** |

*p<0.05 **p<0.01
